# Supplementary material for: Investigation of the enhanced photocathodic activity of La5Ti2CuS5O7photocathodes in H2evolution by synchrotron radiation nanospectroscopy
Source: Royal Society of Chemistry journal article supplement (doi:10.1039/c6nr06541d), 2016-01-01
Supplement: c6nr06541d1.pdf [file c6nr06541d1.pdf]

Supporting Information

**Title: Investigation of the enhanced photocathodic activity of  $\text{La}_5\text{Ti}_2\text{CuS}_5\text{O}_7$  photocathodes in  $\text{H}_2$  evolution by synchrotron radiation nanospectroscopy.**

**Authors:** Enju Sakai, Naoka Nagamura, Jingyuan Liu, Takashi Hisatomi, Taro Yamada, Kazunari Domen, and Masaharu Oshima

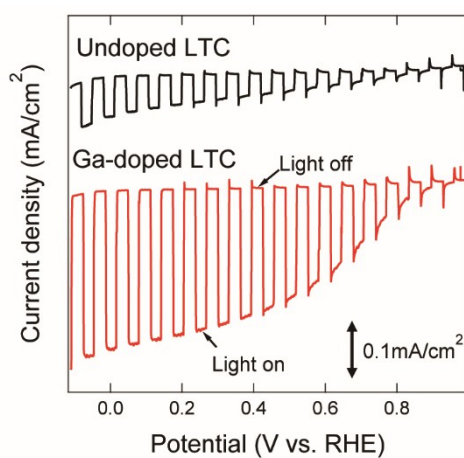

**Figure S1.**  $I$ - $E$  curves for undoped LTC and Ga-doped LTC photocathodes under simulated AM1.5G light. A 0.1 M  $\text{Na}_2\text{SO}_4$  aqueous solution adjusted to pH 10 by adding NaOH was used as the electrolyte.

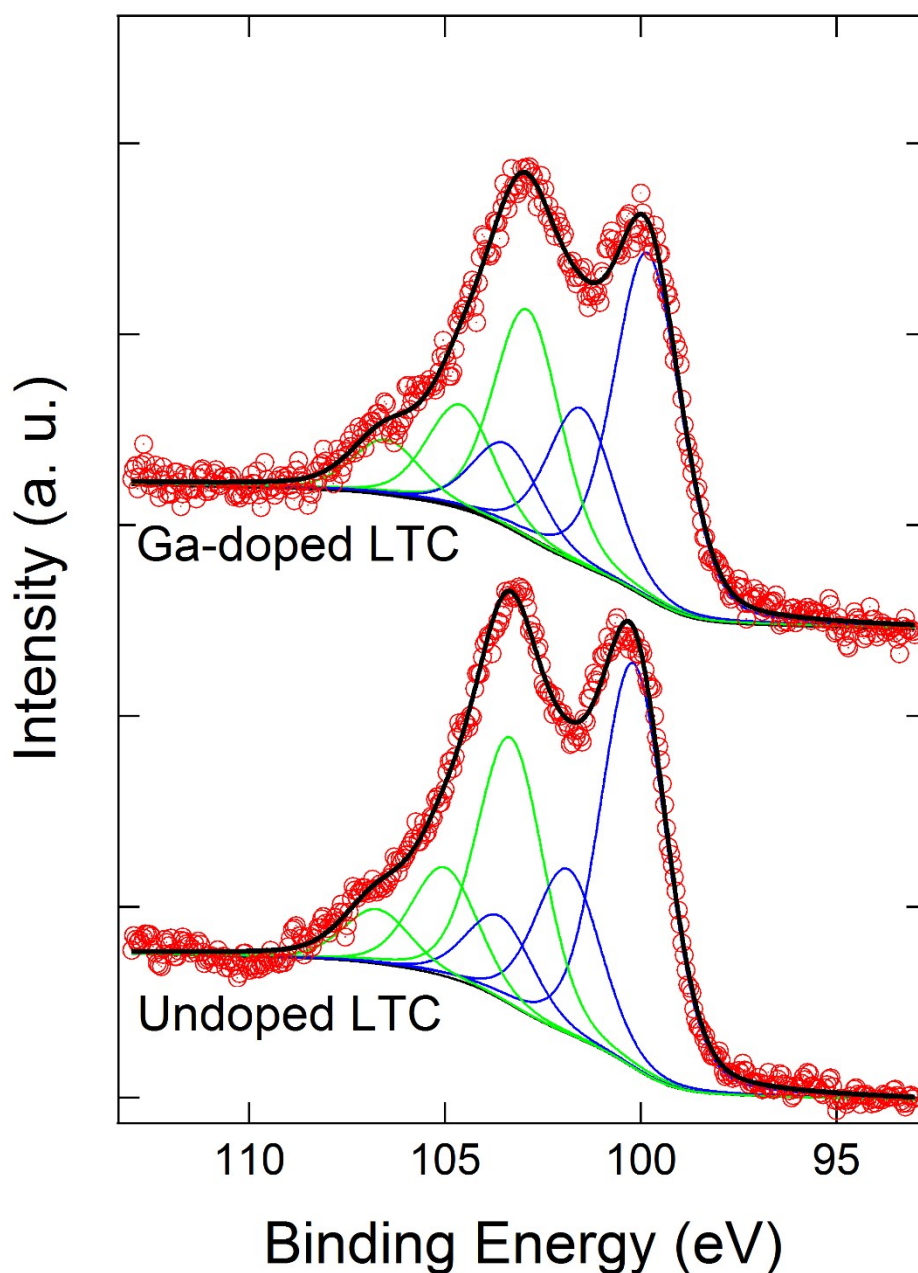

**Figure S2.** La 4d XPS spectra for undoped and Ga-doped LTC with the peak fitting components. Open red circles represent the raw data and a black solid line is fitted data. The blue and green solid lines represent La 4d<sub>5/2</sub> and 4d<sub>3/2</sub> fitting components, respectively. Both La 4d<sub>5/2</sub> and 4d<sub>3/2</sub> peaks are fitted with three components, which is consistent with a previous report<sup>1</sup>. The La 4d<sub>5/2</sub> peak of Ga-doped LTC shift to the lower binding energy by 0.36±0.05 eV compared to that of undoped LTC.

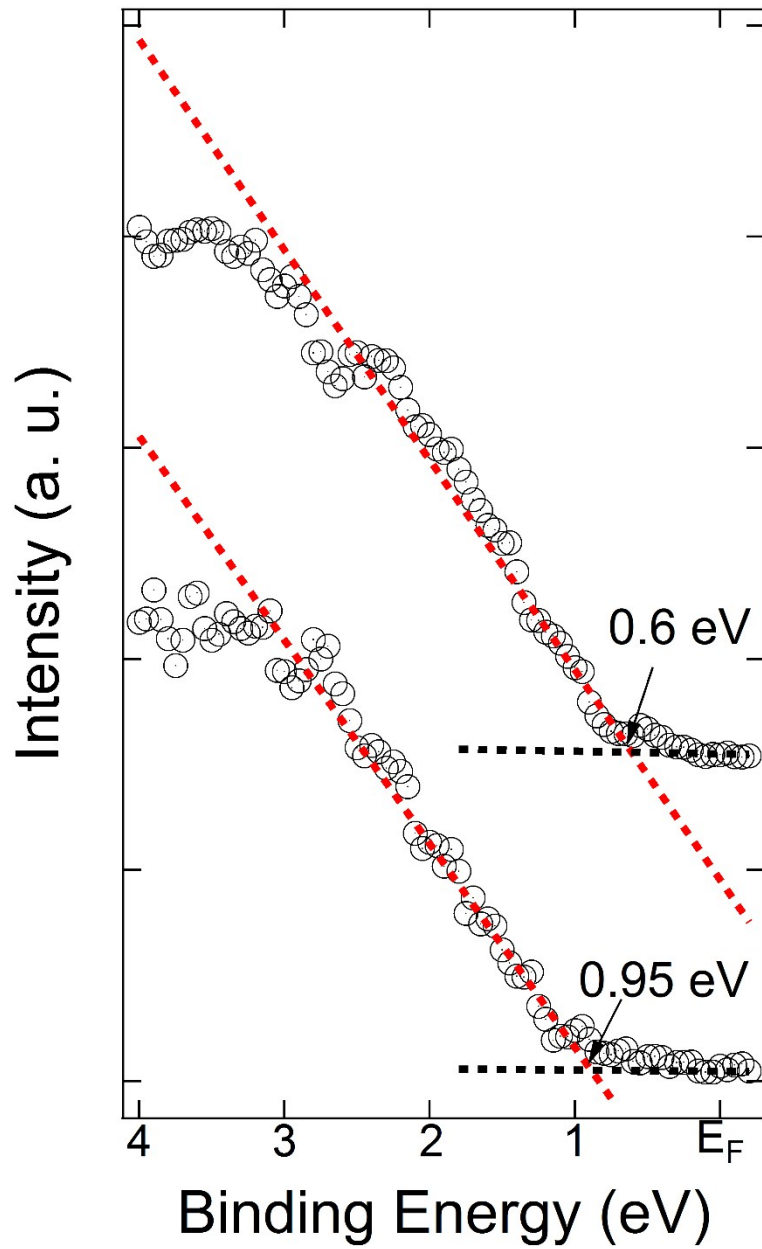

**Figure S3.** Valence band leading edge of LTC (lower) and Ga-doped LTC (upper). The VBMs of them are determined by the linear extrapolating method.

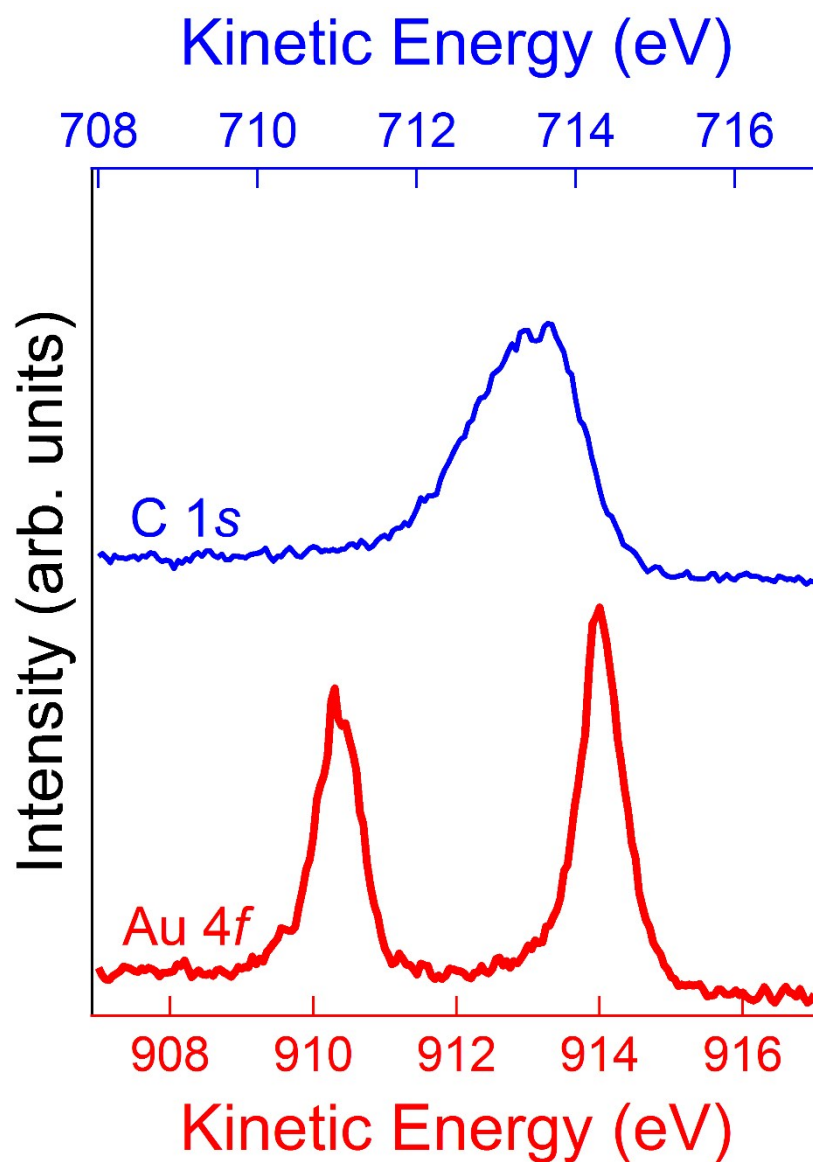

**Figure S4.** C1s and Au 4f XPS spectra with focused x-ray at a position of LTC surface. The kinetic energy at Fermi level is estimated as  $998.0 \pm 0.1$  eV from both C1s and Au  $4f_{7/2}$  peak position, which are assumed as 284.6 and 84.0 eV, respectively.

### Supplementary References

1. M. F. Sunding, K. Hadidi, S. Diplas, O. M. Løvvik, T. E. Norby and A. E. Gunnæs, *J. Electron Spectros. Relat. Phenomena*, 2011, **184**, 399–409.
